# Supplementary material for: Hearing Difficulties and Tinnitus in Construction, Agricultural, Music, and Finance Industries: Contributions of Demographic, Health, and Lifestyle Factors
Source: PubMed Central journal article supplement — Trends Hear. 2019 Nov 20;23:2331216519885571. doi: 10.1177/2331216519885571 (PMC6868580; doi:10.1177/2331216519885571), 2019-11-20
Supplement: TIA885571_Supplemetal_Material.pdf [file TIA885571_Supplemetal_Material.pdf]

**Supplementary Materials 1 – Occupation title codes according to the UK Standard Occupational Classification (2000) which were included in the study under the industries of interest.**

**AGRICULTURE**

|                                               |                                                       |                                             |
|-----------------------------------------------|-------------------------------------------------------|---------------------------------------------|
| 5111001 Agent, farm                           | 5111035 Steward, estate                               | 5112022 Grower                              |
| 5111002 Agriculturist                         | 5111036 Steward, farm                                 | 5112023 Grower (tomato)                     |
| 5111003 Bailiff, estate                       | 5111037 Technician, farm                              | 5112024 Grower (watercress)                 |
| 5111004 Bailiff, farm                         | 5112001 Assistant, gardener's (horticultural nursery) | 5112025 Grower (rose)                       |
| 5111005 Bailiff, land                         | 5112002 Assistant, gardener's (market gardening)      | 5112026 Grower (bulb)                       |
| 5111006 Breeder (livestock)                   | 5112003 Assistant, horticultural                      | 5112027 Grower (market gardening)           |
| 5111007 Breeder (pig)                         | 5112004 Assistant, house, green                       | 5112028 Grower (ornamental tree nursery)    |
| 5111008 Contractor (agricultural contracting) | 5112005 Assistant, nursery (agriculture)              | 5112029 Horticulturist (market gardening)   |
| 5111009 Contractor, agricultural              | 5112006 Cultivator, watercress                        | 5112030 Landscaper, interior                |
| 5111010 Contractor, farm                      | 5112007 Foreman (horticultural nursery)               | 5112031 Manufacturer,                       |
| 5111011 Contractor, ploughing                 | 5112008 Foreman (horticulture)                        | 5112032 Nurseryman                          |
| 5111012 Crofter (farming)                     | 5112009 Foreman, house, glass                         | 5112033 Planter, coffee                     |
| 5111013 Farmer                                | 5112010 Fruitman                                      | 5112034 Planter, rubber                     |
| 5111014 Fieldman                              | 5112011 Fruitman, head                                | 5112035 Planter, tea                        |
| 5111015 Fieldsman                             | 5112012 Gardener (fruit growing)                      | 5112036 Planter, tobacco                    |
| 5111016 Foreman (agriculture)                 | 5112013 Gardener (horticultural nursery)              | 5112037 Planter, tree                       |
| 5111017 Foreman, farm                         | 5112014 Gardener (market gardening)                   | 5112038 Propagator                          |
| 5111018 Foreman ganger (agriculture)          | 5112015 Gardener, fruit                               | 5112039 Pruner (fruit growing)              |
| 5111019 Grieve                                | 5112016 Gardener, market                              | 5112040 Pruner (horticultural nursery)      |
| 5111020 Holder, Small                         | 5112017 Gardener, nursery                             | 5112041 Pruner, tree (fruit growing)        |
| 5111022 Keeper, pig                           | 5112018 Grafter (agriculture)                         | 5112042 Supervisor, nursery (horticultural) |
| 5111023 Keeper, poultry                       | 5112019 Grower (mushroom)                             | 5112043 Technician, horticultural           |
| 5111024 Landholder                            | 5112020 Grower (fruit trees)                          | 5112044 Worker, seed                        |
| 5111025 Manager, herd                         | 5112021 Grower (fruit)                                | 5113001 Assistant, gardener's               |
| 5111026 Manager, pig                          |                                                       | 5113002 Attendant, ground                   |
| 5111027 Manager, poultry                      |                                                       | 5113003 Contractor, gardening               |
| 5111028 Manager, unit, pig                    |                                                       | 5113004 Contractor, landscape               |

|                                         |                                                     |                                                               |
|-----------------------------------------|-----------------------------------------------------|---------------------------------------------------------------|
| 5113005 Contractor, turf                | 5223363 Jobber, ring                                | 8223013 Machinist,<br>agricultural                            |
| 5113006 Cutter, grass                   | 5223364 Jobber, twisting                            | 8223014 Man, plough                                           |
| 5113007 Cutter, turf                    | 5223420 Mechanic,<br>agricultural                   | 8223015 Operator<br>(agricultural machinery)                  |
| 5113008 Designer,<br>garden             | 5223425 Mechanic, farm                              | 8223016 Sprayer<br>(agricultural contracting)                 |
| 5113009 Digger, turf                    | 8111305 Machinist<br>(dairy)                        | 8223017 Sprayer,<br>agricultural                              |
| 5113011 Foreman,<br>landscape           | 8111309 Machinist (grain<br>milling)                | 8223018 Tractorman<br>(agriculture)                           |
| 5113012 Gardener Yes                    | 8111310 Machinist<br>(malting)                      | 8223019 Worker,<br>agricultural (agricultural<br>contracting) |
| 5113013 Gardener,<br>landscape          | 8111465 Miller (animal<br>feeds mfr)                | 9111001 Assistant, farm                                       |
| 5113014 Gardener<br>caretaker           | 8111466 Miller (brewery)                            | 9111002 Assistant,<br>general (agriculture)                   |
| 5113015<br>Gardenergroundsman           | 8111467 Miller (grain<br>milling)                   | 9111003 Assistant,<br>poultry                                 |
| 5113016<br>Gardenerhandyman             | 8111468 Miller (sugar<br>refining)                  | 9111004 Attendant, pig                                        |
| 5113017 Greenkeeper                     | 8111470 Miller, corn                                | 9111005 Attendant,<br>poultry                                 |
| 5113018 Greensman                       | 8111471 Miller, flour                               | 9111006 Castrator (farm<br>livestock)                         |
| 5113019 Groundsman                      | 8111472 Miller, grain                               | 9111007 Cattleman                                             |
| 5113020 Improver, green                 | 8111473 Miller, malt                                | 9111008 Collector, egg<br>(poultry farm)                      |
| 5113021 Keeper, grass                   | 8111474 Miller, mustard                             | 9111009 Cowman                                                |
| 5113022 Keeper, green                   | 8111475 Miller, oil                                 | 9111010 Craftsman,<br>agricultural                            |
| 5113023 Keeper, ground                  | 8111477 Miller, rice                                | 9111011 Cropper<br>(agriculture)                              |
| 5113024 Keeper, grounds                 | 8111478 Miller, spice                               | 9111012 Dairyman<br>(farming)                                 |
| 5119002 Beekeeper                       | 8111536 Operator, mill<br>(grain milling)           | 9111013 Hand, dairy<br>(farming)                              |
| 5119011 Farmer (fish<br>farm, hatchery) | 8111731 Worker, mill<br>(animal feeds mfr)          | 9111014 Hand, farm                                            |
| 5119012 Farmer, fish                    | 8223005 Driver<br>(agricultural machinery)          | 9111015 Handler, poultry                                      |
| 5119013 Farmer, game                    | 8223006 Driver, engine<br>(agriculture)             | 9111016 Handyman,<br>farm                                     |
| 5119014 Farmer, salmon                  | 8223007 Driver, machine<br>(agriculture)            | 9111017 Help, farm                                            |
| 5119015 Farmer, trout                   | 8223008 Driver, tractor<br>(agriculture)            | 9111018 Herdsman                                              |
| 5119016 Fisherman                       | 8223009 Driver, tractor<br>(local government)       | 9111019 Keeper, cow                                           |
| 5119017 Fisherman<br>crofter            | 8223010 Driver-mechanic<br>(agricultural machinery) | 9111020 Keeper, stock<br>(agriculture)                        |
| 5223036 Engineer,<br>agricultural       | 8223011 Feeder, drum<br>(agricultural machinery)    | 9111021 Labourer<br>(agriculture)                             |
| 5223053 Engineer, dairy                 | 8223012 Foreman<br>(agricultural contracting)       |                                                               |
| 5223072 Engineer,<br>horticultural      |                                                     |                                                               |
| 5223172 Fitter,<br>agricultural         |                                                     |                                                               |
| 5223359 Jobber, comb                    |                                                     |                                                               |
| 5223360 Jobber, combing                 |                                                     |                                                               |
| 5223361 Jobber,<br>doubling, ring       |                                                     |                                                               |
| 5223362 Jobber, loom                    |                                                     |                                                               |

9111022 Labourer, agricultural  
9111023 Labourer, estate  
9111024 Labourer, farm  
9111025 Lamber  
9111026 Landworker  
9111027 Man, gang (agriculture)  
9111028 Man, job, odd (agriculture)  
9111029 Man, poultry  
9111030 Man, yard (farming)  
9111031 Master, gang  
9111032 Operative, agricultural  
9111033 Pigman  
9111034 Shepherd  
9111035 Stockman (farming)  
9111036 Stocksman (farming)  
9111037 Supervisor, unit, poultry  
9111038 Wife, farmer's  
9111039 Worker, agricultural  
9111040 Worker, farm  
9111041 Worker, field  
9111042 Worker, general (farming)  
9111043 Worker, land  
9111044 Worker, poultry  
9111045 Worker, wire (hop growing)  
9111046 Yardsman (farming)  
9119001 Assistant, farm, fish  
9119002 Assistant, farm, mink  
9119028 Cutter, hay (farming)  
9119034 Cutter, straw (farming)  
9119035 Cutter, vegetable

9119036 Cutter, watercress  
9119043 Gatherer (agricultural products)  
9119057 Handyman, gardener's  
9119058 Handyman-gardener  
9119059 Harpooner  
9119060 Harvester (fruit, vegetable growing)  
9119098 Picker (fruit, vegetable growing)  
9119099 Picker, flower  
9119100 Picker, fruit (farming)  
9119101 Picker, hop  
9119102 Picker, moss  
9119103 Picker, mushroom  
9119104 Picker, pea (farming)  
9119105 Picker, potato

#### MUSIC

3413011 Chorister  
3413042 Vocalist  
3415001 Accompanist  
3415003 Bandmaster  
3415004 Bandsman  
3415005 Bassoonist  
3415006 Campanologist  
3415007 Cellist  
3415008 Clarinettist  
  
3415010 Conductor (entertainment)  
3415011 Conductor, music  
3415012 Conductor, musical  
3415014 Cornetist  
3415015 Director of music (entertainment)  
3415016 Director, musical  
3415017 Drummer (entertainment)  
3415018 Flautist  
3415019 Guitarist  
3415020 Harpist  
3415021 Instrumentalist  
3415022 Leader, band

3415023 Leader, orchestra  
3415024 Major, pipe  
3415025 Master, band  
3415026 Musician  
3415027 Oboist  
3415028 Orchestrator  
  
3415030 Organist  
3415031 Performer  
3415032 Pianist  
3415033 Player (musical instruments)  
3415034 Ringer, bell  
  
3415036 Trombonist  
3415037 Tympanist  
3415038 Violinist  
3415039 Violoncellist

#### CONSTRUCTION

1122002 Agent, builder's  
1122003 Agent, contractor's  
1122004 Agent, engineering, civil  
1122005 Agent, site  
1122006 Clerk of works  
1122007 Director (building and contracting)  
1122008 Director (civil engineering)  
1122009 Director, building  
1122010 Director, contracts (construction)  
1122011 Director, managing (building and construction)  
1122012 Manager (alarm, security, installation)  
1122013 Manager (building and contracting)  
1122014 Manager (civil engineering)  
1122017 Manager (local government: highways dept)

|                                                                     |                                                       |                                                                 |
|---------------------------------------------------------------------|-------------------------------------------------------|-----------------------------------------------------------------|
| 1122018 Manager, area<br>(construction)                             | 1122039 Merchant<br>(building and contracting)        | 3114001 Assistant,<br>building                                  |
| 1122019 Manager,<br>building                                        | 1122040 Owner (building<br>and contracting)           | 3114002 Assistant,<br>engineering, civil                        |
| 1122020 Manager,<br>commercial (building and<br>contracting)        | 1122043 Owner<br>(property renovation)                | 3114003 Assistant,<br>technical (civil<br>engineering)          |
| 1122021 Manager,<br>construction                                    | 1122044 Subagent<br>(building and<br>construction)    | 3114004 Consultant,<br>building                                 |
| 1122022 Manager,<br>contract (building and<br>contracting)          | 1234050 Merchant,<br>builders                         | 3114005 Consultant,<br>construction                             |
| 1122023 Manager,<br>contracts (building and<br>contracting)         | 2121006 Engineer<br>(professional, highways)          | 3114006 Consultant,<br>services, building                       |
| 1122024 Manager,<br>contracts, building                             | 2121008 Engineer<br>(professional, highway)           | 3114007 Controller,<br>production (building and<br>contracting) |
| 1122025 Manager,<br>demolition                                      | 2121011 Engineer<br>(professional, civil)             | 3114008 Coordinator,<br>project (construction)                  |
| 1122026 Manager,<br>development (building<br>and contracting)       | 2121013 Engineer<br>(professional,<br>constructional) | 3114009 Engineer,<br>incorporated (civil<br>engineering)        |
| 1122027 Manager,<br>highway                                         | 2121014 Engineer<br>(professional, irrigation)        | 3114010 Engineer,<br>services, building                         |
| 1122028 Manager,<br>highways                                        | 2121015 Engineer<br>(professional, structural)        | 3114011 Officer,<br>conservation, energy                        |
| 1122029 Manager,<br>maintenance (buildings<br>and other structures) | 2121016 Engineer<br>(professional, water)             | 3114012 Officer,<br>technical (civil<br>engineering)            |
| 1122030 Manager,<br>maintenance, property                           | 2121023 Engineer,<br>building                         | 3114013 Technician<br>(engineering, structural)                 |
| 1122031 Manager, plant<br>(building and contracting)                | 2121024 Engineer,<br>building and civil               | 3114014 Technician<br>(engineering, civil)                      |
| 1122032 Manager,<br>production (building and<br>contracting)        | 2121025 Engineer, city                                | 3114015 Technician,<br>building                                 |
| 1122033 Manager,<br>projects (building and<br>contracting)          | 2121026 Engineer, civil                               | 3114016 Technician,<br>engineering, civil                       |
| 1122034 Manager,<br>services, building                              | 2121029 Engineer,<br>contractor's                     | 3114017 Technician,<br>engineering, structural                  |
| 1122035 Manager,<br>services, site                                  | 2121041 Engineer,<br>highway                          | 3122001 Analyst, stress<br>(construction,<br>engineering)       |
| 1122036 Manager, site                                               | 2121042 Engineer,<br>highways                         | 5223062 Engineer,<br>excavator                                  |
| 1122037 Manager, works<br>(building and contracting)                | 2121043 Engineer,<br>irrigation (professional)        | 5223066 Engineer,<br>forklift                                   |
| 1122038 Master of works                                             | 2121055 Engineer, site                                | 5243017 Joiner, cable                                           |
|                                                                     | 2121057 Engineer,<br>structural                       |                                                                 |
|                                                                     | 2128015 Inspector (civil<br>engineering)              |                                                                 |
|                                                                     | 2434013 Surveyor,<br>building                         |                                                                 |

5243018 Joiner, conduit, electric  
5243019 Joiner, electric  
5243020 Joiner, electrical  
5243021 Joiner, wire  
5243022 Joiner plumber  
5311003 Engineer, constructional  
5311021 Foreman (metal trades: constructional engineering)  
5311022 Foreman, engineering, constructional  
5311023 Spiderman  
5311024 Steelworker (structural engineering)  
5311025 Worker, iron (constructional engineering)  
5311026 Worker, steel (structural engineering)  
5312007 Bricklayer  
5312012 Builder, chimney  
5312020 Builder, sewer  
5312021 Builder, stove  
5312025 Contractor (bricklaying)  
5312026 Contractor, bricklaying  
5312127 Worker, marble  
5313003 Constructor, roofing  
5313004 Contractor, roofing  
5313005 Coverer, roof  
5313006 Engineer, roofing  
5313007 Erector, roof  
5313008 Erector, roofing, galvanised  
5313009 Felter (building and contracting)  
5313010 Fitter, asbestos  
5313011 Fixer, asbestos

5313012 Fixer, felt  
5313013 Fixer, roofing  
5313014 Layer, felt (roofing)  
5313015 Liner, roof  
5313016 Mechanic, roof  
5313017 Repairer, roof  
5313018 Roofer  
5313019 Roofer, felt  
5313020 Sheeter (building and contracting)  
5313021 Sheeter (chemical mfr)  
5313022 Sheeter, asbestos  
5313023 Sheeter, asbestos (building and contracting)  
5313024 Sheeter, cement, asbestos  
5313025 Sheeter, constructional  
5313026 Sheeter, iron, corrugated  
5313027 Sheeter, roof  
5313028 Slater  
5313029 Slater and tiler  
5313030 Thatcher  
5313031 Tiler  
5313032 Tiler, roof  
5314004 Contractor, plumbing  
5314011 Engineer, domestic (plumbing)  
5314012 Engineer, field (heating and ventilating)  
5314013 Engineer, gas  
5314014 Engineer, gas and water  
5314015 Engineer, heat and domestic  
5314016 Engineer, heating  
5314017 Engineer, heating and lighting  
5314018 Engineer, heating and plumbing

5314019 Engineer, heating and ventilating  
5314020 Engineer, heating, central  
5314021 Engineer, installation (heating and ventilating)  
5314022 Engineer, mains (gas supplier)  
5314023 Engineer, maintenance (heating and ventilating)  
5314024 Engineer, plumbing  
5314025 Engineer, plumbing and heating  
5314026 Engineer, sanitary  
5314027 Engineer, service (gas)  
5314028 Engineer, service (heating and ventilating)  
5314029 Engineer, service (heating engineering)  
5314030 Engineer, service, gas  
5314031 Engineer, thermal  
5314032 Engineer, thermal and acoustic  
5314033 Engineer, ventilating  
5314034 Engineer, ventilation  
5314086 Plumber  
5314087 Plumber and decorator  
5314088 Plumber and gasfitter  
5315005 Carpenter  
5315006 Carpenter and joiner  
5315023 Fixer (carpentry and joinery)

|                                                                      |                                                                      |                                                  |
|----------------------------------------------------------------------|----------------------------------------------------------------------|--------------------------------------------------|
| 5315024 Fixer, roof<br>(building and contracting)                    | 8142005 Constructor,<br>road                                         | 8142037 Man, road<br>(building and contracting)  |
| 5316031 Maker, frame,<br>window (metal)                              | 8142006 Contractor, road                                             | 8142038 Man, road (local<br>government)          |
| 5319004 Builder (building<br>and contracting)                        | 8142008 Erector,<br>concrete                                         | 8142039 Man, surface<br>(civil engineering)      |
| 5319005 Builder and<br>contractor                                    | 8142009 Finisher,<br>concrete (building and<br>contracting)          | 8142040 Man, tar<br>(building and contracting)   |
| 5319006 Builder and<br>decorator                                     | 8142010 Flagger                                                      | 8142041 Marker, road                             |
| 5319009 Builder, garage                                              | 8142011 Foreman (local<br>government: highways<br>dept)              | 8142042 Mason, street                            |
| 5319010 Builder, general                                             | 8142012 Foreman,<br>concrete                                         | 8142043 Mender, road                             |
| 5319011 Builder, house                                               | 8142013 Foreman,<br>highways                                         | 8142044 Operative,<br>highways                   |
| 5319012 Builder, jobbing                                             | 8142014 Foreman, road                                                | 8142045 Paver                                    |
| 5319013 Builder,<br>maintenance                                      | 8142015 Ganger,<br>highways                                          | 8142046 Paver, tar                               |
| 5319014 Builder, master                                              | 8142017 Hand,<br>maintenance (local<br>government: highways<br>dept) | 8142047 Pavior                                   |
| 5319015 Contractor,<br>builder's                                     | 8142018 Inspector (local<br>government: highways<br>dept)            | 8142048 Pavior, tar                              |
| 5319016 Contractor,<br>building                                      | 8142019 Inspector,<br>highways                                       | 8142049 Paviour Yes                              |
| 5319017 Craftsman,<br>general (building)                             | 8142020 Inspector,<br>paving and extension                           | 8142050 Paviour, tar                             |
| 5319023 Engineer,<br>acoustics                                       | 8142021 Inspector, road                                              | 8142063 Worker,<br>concrete                      |
| 5319024 Engineer,<br>construction                                    | 8142022 Inspector, roads                                             | 8142065 Worker, road                             |
| 5319025 Engineer,<br>control, noise                                  | 8142023 Layer, asphalt                                               | 8149007 Contractor,<br>demolition                |
| 5319026 Engineer,<br>insulation                                      | 8142024 Layer, concrete                                              | 8149008 Contractor,<br>engineer's, civil         |
| 5319027 Engineer,<br>irrigation                                      | 8142025 Layer, floor,<br>concrete                                    | 8149009 Contractor,<br>engineering, civil        |
| 5319028 Engineer,<br>maintenance (buildings<br>and other structures) | 8142026 Layer, kerb                                                  | 8149010 Contractor,<br>general                   |
| 5319055 Steeplejack                                                  | 8142027 Layer, road                                                  | 8149011 Contractor,<br>works, public             |
| 5319059 Technician,<br>concrete                                      | 8142028 Layer, slab                                                  | 8149012 Corer, hard                              |
| 5321002 Contractor<br>(plastering)                                   | 8142029 Layer, stone                                                 | 8149013 Demolisher                               |
| 5321003 Contractor,<br>plastering                                    | 8142031 Layer, tar                                                   | 8149014 Dismantler<br>(building and contracting) |
| 5322020 FLOORER                                                      | 8142032 Layer, tarmac                                                | 8149015 Engineer,<br>demolition                  |
| 5322021 Foreman<br>(flooring contracting)                            | 8142034 Lengthman,<br>road                                           | 8149016 Engineer,<br>explosives (demolition)     |
| 8133445 Tester, cement                                               | 8142035 Leveller,<br>concrete                                        | 8149017 Engineer,<br>insulating                  |
|                                                                      | 8142036 Maker, road                                                  | 8149018 Engineer,<br>insulation, thermal         |
|                                                                      |                                                                      | 8149019 Erector,<br>building, portable           |
|                                                                      |                                                                      | 8149020 Erector, ceiling                         |

|                                                     |                                                          |                                                        |
|-----------------------------------------------------|----------------------------------------------------------|--------------------------------------------------------|
| 8149021 Erector, garage                             | 8149139 Superintendent, mains                            | 8221018 Driver, drum (steelworks)                      |
| 8149022 Erector, greenhouse                         | 8149140 Superintendent, maintenance                      | 8221019 Driver, elevator                               |
| 8149023 Erector, prefab                             | 8149141 Superintendent, repairs                          | 8221020 Driver, engine, cable                          |
| 8149024 Erector, sign                               | 8149142 Superintendent, works (building and contracting) | 8229020 Driver, bulldozer                              |
| 8149025 Firer, shot (civil engineering)             | 8149143 Superintendent, works (local government)         | 8229026 Driver, crawler                                |
| 8149026 Fitter (shop blind mfr)                     | 8149144 Supervisor, area (building and contracting)      | 8229027 Driver, digger                                 |
| 8149027 Fitter, blind                               | 8149145 Supervisor, building                             | 8229028 Driver, dozer, angle                           |
| 8149028 Fitter, ceiling                             | 8149146 Supervisor, contract (building and contracting)  | 8229029 Driver, dredger                                |
| 8149029 Fitter, distribution (gas supplier)         | 8149147 Supervisor, contracts (building and contracting) | 8229030 Driver, drott                                  |
| 8149030 Fitter, distribution (water works)          | 8149148 Supervisor, distribution (water company)         | 8229031 Driver, dumper                                 |
| 8149042 Foreman (building and contracting)          | 8149149 Supervisor, erection (building and contracting)  | 8229032 Driver, euclid                                 |
| 8149043 Foreman (civil engineering)                 | 8149150 Supervisor, maintenance                          | 8229033 Driver, excavator                              |
| 8149044 Foreman (construction)                      | 8149155 Worker, demolition                               | 8229034 Driver, gearhead (coal mine)                   |
| 8149051 Foreman, bridge                             | 8211031 Driver, lorry                                    | 8229035 Driver, grader                                 |
| 8149052 Foreman, builder's                          | 8211032 Driver, pump, concrete                           | 8229036 Driver, loader (building and contracting)      |
| 8149053 Foreman, building                           | 8211038 Driver, tanker                                   | 8229037 Driver, machine (civil engineering)            |
| 8149054 Foreman, civilian (government)              | 8211039 Driver, tipper                                   | 8229038 Driver, machine (gas works)                    |
| 8149055 Foreman, contractor's                       | 8211040 Driver, tractor (road transport)                 | 8229039 Driver, machine, spreading (asphalt, concrete) |
| 8149056 Foreman, demolition                         | 8211041 Driver, transport                                | 8229043 Driver, pile                                   |
| 8149088 Jointer (civil engineering)                 | 8211042 Driver, transporter                              | 8229044 Driver, plant (building and contracting)       |
| 8149133 Superintendent (building and contracting)   | 8211043 Driver, truck (road transport)                   | 8229045 Driver, roller                                 |
| 8149134 Superintendent (engineering: civil)         | 8211044 Driver, vehicle, articulated                     | 8229046 Driver, scoop                                  |
| 8149135 Superintendent (engineering: structural)    | 8221016 Driver, crane                                    | 8229047 Driver, scraper                                |
| 8149136 Superintendent of works                     | 8221017 Driver, derrick                                  | 8229048 Driver, sentinel                               |
| 8149137 Superintendent, distribution (gas supplier) |                                                          | 8229049 Driver, shovel                                 |
| 8149138 Superintendent, district (gas supplier)     |                                                          | 8229050 Driver, steamroller                            |
|                                                     |                                                          | 8229054 Driver, tractor (building and contracting)     |
|                                                     |                                                          | 8229062 Excavator (building and contracting)           |
|                                                     |                                                          | 8229063 Excavator (steelworks)                         |
|                                                     |                                                          | 8229065 Foreman, dredging                              |

8229066 Foreman, piling  
(civil engineering)  
8229067 Foreman, plant  
(building and contracting)  
8229068 Hammerman  
(pile driving)  
8229072 Machinist  
(railways: civil engineer's  
dept)  
8229076 Machinist,  
paving, concrete  
8229077 Machinist,  
tamping  
8229078 Machinist,  
tracklaying  
8229079 Man, digger  
8229080 Man, navvy  
8229081 Man, plate  
(asphalt spreading)  
8229082 Master, dredger  
8229083 Master,  
dredging  
8229084 Mate, driver's,  
excavator  
8229085 Officer, deck  
(dredging contractors)  
8229086 Operative, piling  
8229087 Operator  
(construction machinery)  
8229088 Operator, JCB  
8229089 Operator,  
bulldozer  
8229090 Operator,  
caterpillar  
8229091 Operator,  
charger (rolling mill)  
8229092 Operator,  
dredger  
8229093 Operator, drill,  
pneumatic  
8229094 Operator, drott  
8229095 Operator,  
excavator  
8229096 Operator, line,  
drag  
8229097 Operator, plant

8229098 Operator, plant  
(building and contracting)  
8229100 Operator, plant,  
builder's  
8229101 Operator, plant,  
constructional  
8229108 Trucker  
9119144 Worker,  
watercress  
9121001 Assistant,  
bricklayer's  
9121002 Assistant,  
carpenter's  
9121003 Assistant,  
glazier's  
9121004 Assistant,  
joiner's  
9121005 Assistant,  
mason's  
9121006 Assistant,  
plasterer's  
9121007 Assistant,  
plumber's  
9121008 Assistant,  
regulator's, gas  
9121014 Hand,  
maintenance (building  
and contracting)  
9121016 Handyman,  
builder's  
9121017 Handyman,  
carpenter's  
9121018 Handyman,  
fitter's (pipe)  
9121019 Handyman,  
general  
9121020 Handyman,  
general (building and  
contracting)  
9121021 Handyman,  
maintenance  
9121022 Handyman,  
maintenance (building  
and contracting)  
9121023 Handyman, nos  
(residential buildings)  
9121024 Handyman, nos

9121025 Handyman, nos  
(building and contracting)  
9121026 Helper,  
bricklayer's  
9121027 Helper,  
carpenter's  
9121028 Helper, mason's  
9121029 Labourer  
(building and contracting)  
9121030 Labourer,  
bricklayer's  
9121031 Labourer,  
bricksetter's  
9121032 Labourer,  
builder's Yes  
9121034 Labourer,  
building  
9121035 Labourer,  
carpenter's  
9121036 Labourer,  
contractor's  
9121037 Labourer,  
cooper's  
9121038 Labourer,  
engineer's, civil  
9121039 Labourer,  
engineering, civil  
9121062 Mate,  
asphalter's  
9121063 Mate, builder's  
9121064 Mate,  
carpenter's  
9121065 Mate,  
carpenter's and joiner's  
9121098 Worker,  
building  
9121099 Worker,  
construction  
9121100 Worker, ground  
(building and contracting)

## **FINANCE**

1131002 Banker Yes  
1131003 Banker,  
international  
1131004 Banker,  
investment



|                                                 |                                                         |                                                               |
|-------------------------------------------------|---------------------------------------------------------|---------------------------------------------------------------|
| 1131005 Banker,<br>merchant                     | 1131035 Manager,<br>investment                          | 1151014 Manager,<br>account, customer<br>(financial services) |
| 1131010 Director, finance                       | 1131036 Manager,<br>market, money                       | 1151015 Manager, bank                                         |
| 1131011 Director,<br>financial                  | 1131037 Manager,<br>markets (financial<br>services)     | 1151016 Manager,<br>banking                                   |
| 1131013 Manager<br>(accountancy services)       | 1131038 Manager, office<br>(credit control)             | 1151017 Manager,<br>branch (assurance<br>company)             |
| 1131014 Manager<br>(accountancy)                | 1131041 Manager,<br>systems, financial                  | 1151018 Manager,<br>branch (bank, building<br>society)        |
| 1131015 Manager<br>(banking: merchant)          | 1131042 Manager, tax                                    | 1151019 Manager,<br>branch (insurance)                        |
| 1131016 Manager (credit<br>company)             | 1131043 Manager,<br>taxation                            | 1151020 Manager,<br>broking                                   |
| 1131017 Manager<br>(financial services)         | 1131044 Manager,<br>treasury                            | 1151021 Manager, card,<br>credit                              |
| 1131018 Manager (loan<br>company)               | 1131045 Manager,<br>valuation                           | 1151022 Manager, claims                                       |
| 1131019 Manager<br>(money lending)              | 1131046 Principal<br>(banking)                          | 1151023 Manager,<br>company, insurance                        |
| 1131020 Manager, VAT                            | 1151001 Banker (finance)                                | 1151024 Manager,<br>corporate (bank, building<br>society)     |
| 1131021 Manager,<br>assessment, credit          | 1151002 Banker,<br>business                             | 1151025 Manager,<br>department (bank,<br>building society)    |
| 1131022 Manager,<br>branch (credit company)     | 1151003 Head of lending                                 | 1151026 Manager,<br>department (insurance)                    |
| 1131023 Manager,<br>branch (financial services) | 1151004 Manager<br>(average adjusting)                  | 1151027 Manager,<br>departmental (bank,<br>building society)  |
| 1131024 Manager, client<br>(financial services) | 1151005 Manager<br>(banking)                            | 1151028 Manager,<br>departmental (insurance)                  |
| 1131025 Manager,<br>control, credit             | 1151006 Manager<br>(building society)                   | 1151029 Manager,<br>district (friendly society)               |
| 1131026 Manager, credit                         | 1151007 Manager<br>(insurance brokers)                  | 1151030 Manager,<br>divisional (insurance)                    |
| 1131027 Manager,<br>derivatives                 | 1151008 Manager<br>(insurance)                          | 1151031 Manager, equity                                       |
| 1131028 Manager,<br>development, agency         | 1151009 Manager (postal<br>services)                    | 1151032 Manager, fund,<br>pension                             |
| 1131029 Manager,<br>exchange, foreign           | 1151010 Manager (stock<br>jobbers)                      | 1151033 Manager,<br>insurance                                 |
| 1131030 Manager,<br>finance                     | 1151011 Manager<br>(stockbrokers)                       | 1151034 Manager,<br>lending                                   |
| 1131031 Manager,<br>financial                   | 1151012 Manager,<br>account (bank, building<br>society) | 1151035 Manager,<br>market, mortgages                         |
| 1131032 Manager, fund                           | 1151013 Manager,<br>account (insurance)                 |                                                               |
| 1131033 Manager,<br>house, acceptance           |                                                         |                                                               |
| 1131034 Manager,<br>insolvency                  |                                                         |                                                               |

|                                                              |                                                 |                                                      |
|--------------------------------------------------------------|-------------------------------------------------|------------------------------------------------------|
| 1151036 Manager,<br>mortgage                                 | 3533006 Handler,<br>insurance                   | 3534016 Analyst, pricing                             |
| 1151037 Manager, office,<br>insurance                        | 3533007 Inspector<br>(insurance)                | 3534017 Arranger,<br>mortgage                        |
| 1151038 Manager, office,<br>post                             | 3533008 Inspector,<br>business, new (insurance) | 3534018 Associate, sales<br>(insurance)              |
| 1151039 Manager,<br>operations (bank,<br>building society)   | 3533009 Inspector, chief<br>(insurance)         | 3534019 Consultant<br>(financial services)           |
| 1151040 Manager,<br>operations, bank                         | 3533010 Inspector,<br>district (insurance)      | 3534020 Consultant,<br>banking                       |
| 1151041 Manager,<br>pensions                                 | 3533011 Inspector,<br>insurance                 | 3534021 Consultant,<br>care, health (insurance)      |
| 1151042 Manager,<br>planning, financial                      | 3533012 Inspector, life<br>(insurance)          | 3534022 Consultant,<br>financial                     |
| 1151043 Manager,<br>project (financial<br>services)          | 3533013 Leader, team<br>(insurance)             | 3534023 Consultant,<br>insurance                     |
| 1151044 Manager, sales<br>(bank, building society)           | 3533014 Member of<br>Lloyds                     | 3534024 Consultant,<br>investment                    |
| 1151045 Manager,<br>services, client (financial<br>services) | 3533015 Underwriter                             | 3534025 Consultant,<br>mortgage                      |
| 1151046 Manager,<br>settlements                              | 3533016 Underwriter,<br>insurance               | 3534026 Consultant,<br>pension                       |
| 1151047 Manager,<br>society, building                        | 3534001 Adviser,<br>financial                   | 3534027 Consultant,<br>planning, financial           |
| 1151048 Manager,<br>society, friendly                        | 3534002 Adviser,<br>investment                  | 3534028 Consultant,<br>services, financial           |
| 1151049 Manager,<br>underwriting                             | 3534003 Adviser, loans,<br>financial            | 3534029 Consultant,<br>technical, pensions           |
| 1151050 Manager, unit,<br>mortgage                           | 3534004 Adviser,<br>mortgage                    | 3534030 Counsellor,<br>investment                    |
| 1151051 Master, post                                         | 3534005 Adviser, pension                        | 3534031 Executive,<br>account (insurance)            |
| 1151052 Master, post,<br>sub                                 | 3534006 Adviser,<br>planning, financial         | 3534032 Financier                                    |
| 1151053 Master, subpost                                      | 3534007 Adviser,<br>services, financial         | 3534033 Inspector,<br>pensions                       |
| 1151054 Postmaster                                           | 3534008 Adviser,<br>technical (insurance)       | 3534034 Interviewer<br>(bank, building society)      |
| 1151055 Postmistress                                         | 3534009 Agent, financial                        | 3534035 Manager,<br>portfolio                        |
| 1151056 Subpostmaster                                        | 3534010 Agent, money                            | 3534036 Officer,<br>investment (banking,<br>finance) |
| 3533003 Handler,<br>account (insurance)                      | 3534011 Agent,<br>mortgage                      | 3534037 Officer,<br>planning, financial              |
| 3533004 Handler,<br>account, insurance                       | 3534012 Analyst<br>(financial services)         | 3534038 Officer, schemes<br>(insurance)              |
| 3533005 Handler,<br>accounts (insurance)                     | 3534013 Analyst, credit<br>financial            | 3534039 Planner,<br>financial                        |
|                                                              | 3534014 Analyst,<br>financial                   |                                                      |
|                                                              | 3534015 Analyst,<br>investment                  |                                                      |

3535001 Accountant, tax  
3535002 Accountant,  
taxation  
3535003 Adviser, VAT  
3535004 Adviser,  
taxation  
3535005 Consultant, VAT  
3535006 Consultant, tax  
3535007 Inspector of  
taxes  
3537002 Administrator,  
trust (banking)  
3537003 Clerk, managing  
(accountancy)  
3537004 Controller  
(banking)  
3537005 Controller,  
financial  
3537006 Officer, trust  
3537007 Senior, audit  
3537008 Senior, trust  
3537009 Technician  
(accountancy)  
3537010 Technician,  
account  
3537011 Technician,  
accounting  
3537012 Technician,  
audit  
4121001 Administrator,  
loans  
4121002 Assistant,  
control, credit  
4121003 Clerk,  
authorisation (bank,  
building society)  
4121004 Clerk, control,  
credit  
4121005 Controller,  
credit  
4121006 Coordinator,  
claim, credit  
4121007 Officer, control,  
credit  
4121008 Supervisor,  
control, credit

4121009 Supervisor,  
credit  
4122001 Accountant  
4122002 Accountant and  
auditor  
4122003 Accountant,  
barrack  
4122004 Accountant,  
barracks  
4122005 Accountant,  
cost  
4122006 Accountant,  
cost and works  
4122007 Accountant,  
financial (coal mine)  
4122008 Accountant,  
group  
4122009 Accountant,  
management  
4122010 Accountant,  
works  
4122011 Administrator,  
account  
4122012 Administrator,  
accounts  
4122013 Administrator,  
bonus  
4122014 Administrator,  
cost  
4122015 Administrator,  
finance  
4122016 Administrator,  
financial Y  
4122017 Administrator,  
holding, fund  
4122018 Administrator,  
ledger  
4122019 Administrator,  
pay  
4122020 Administrator,  
payroll  
4122023 Assistant,  
account  
4122024 Assistant,  
accountancy  
4122025 Assistant,  
accountant's

4122026 Assistant,  
accounts  
7122025 Collector, credit  
7122026 Collector, debt
